# Supplementary material for: Omniphobic nanocomposite fiber mats with peel-away self similarity
Source: Royal Society of Chemistry journal article supplement (doi:10.1039/c5ta06333g), 2015-01-01
Supplement: c5ta06333g1.pdf [file c5ta06333g1.pdf]

## Supplementary Information

# Self-similar Omniphobic Coatings of Electrospun Fluorinated Nanocomposites

*Alexander Davis,<sup>\*</sup> Elisa Mele,<sup>‡</sup> José Alejandro Heredia-Guerrero, Ilker S. Bayer,<sup>\*</sup>*

*and Athanassia Athanassiou<sup>\*</sup>*

<sup>a</sup>Smart Materials, Nanophysics, Istituto Italiano di Tecnologia, Genoa, 16163, Italy

<sup>‡</sup>Present Address: Department of Materials, Loughborough University, Loughborough, Leicestershire  
LE11 3TU, UK

<sup>\*</sup>Email: alexander.davis@iit.it; ilker.bayer@iit.it; athanassia.athanassiou@iit.it

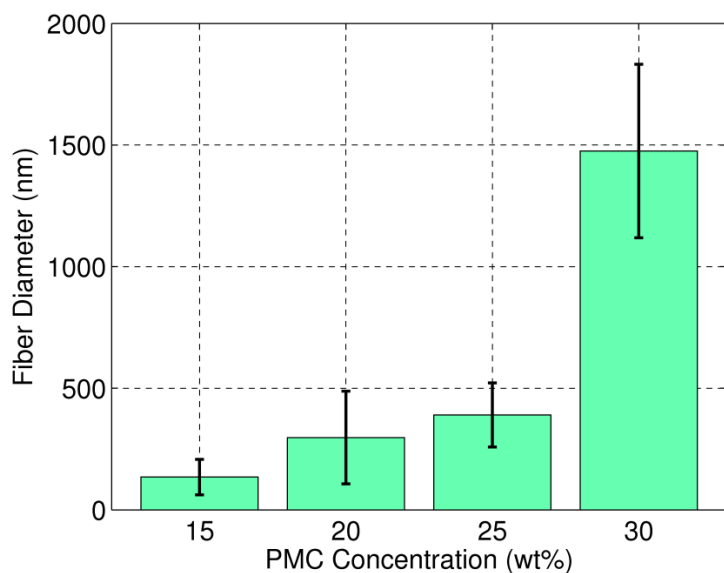

**Fig S1.** Mean fiber width as a function of PMC wt%. To calculate mean fiber width, the width of 20 different fibers was measured and averaged. Error bars extend to minimum and maximum measured.

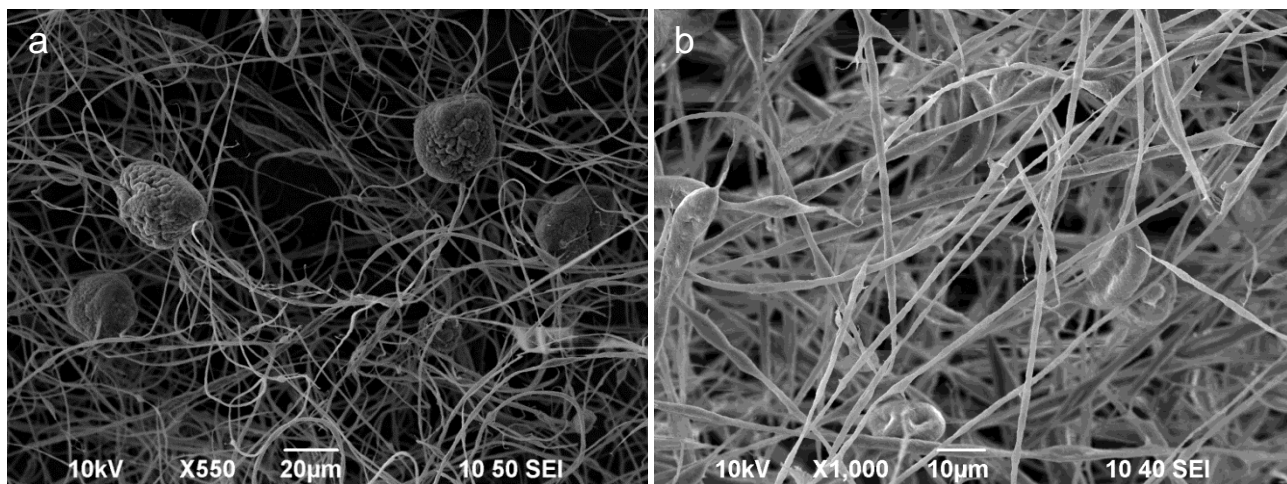

**Fig S2.** (a) SEM image of PMC/SiO<sub>2</sub> composite nanofibers produced when using 3000 μL/hr solution injection rate. Due to the relatively high rate, nanoparticles were not well dispersed in the polymer matrix and aggregated outside of the fibers. (b) SEM image of fibers produced when 7:1 PMC:SiO<sub>2</sub> ratio, with significant beads and other deviations from the desired fiber structure observed.

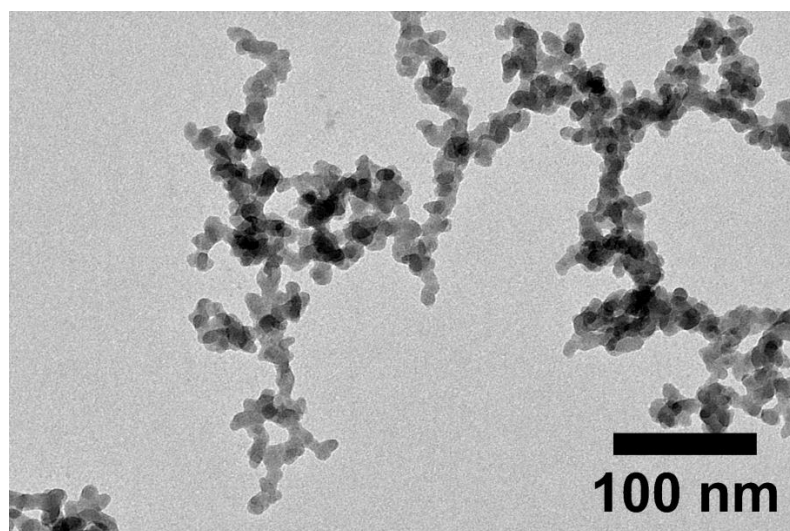

**Fig S3.** TEM micrograph of Aerosil R812 fumed silicon dioxide nanoparticles.

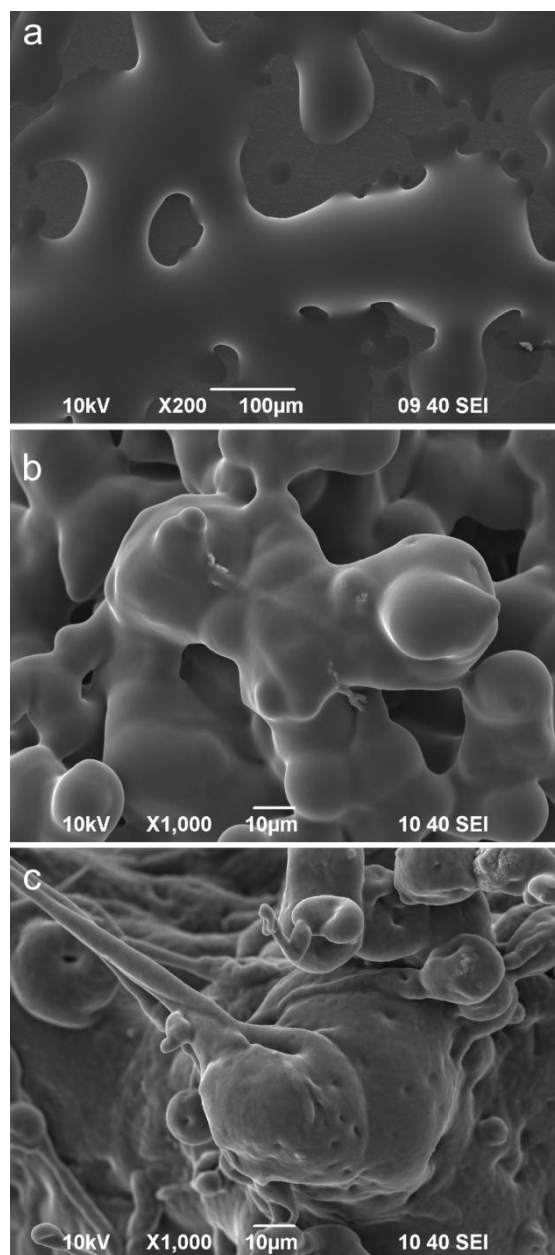

**Fig S4.** SEM images of surfaces made by spray-casting a) 0 wt% SiO<sub>2</sub> (PMC only), b) 20:1 PMC:SiO<sub>2</sub>, and c) 10:1 PMC:SiO<sub>2</sub> solutions in acetone.
